# Supplementary material for: Optimizing whole-genomic prediction for autotetraploid blueberry breeding
Source: PubMed Central journal article supplement (PMC7784927; doi:10.1038/s41437-020-00357-x), 2020-10-19
Supplement: 41437_2020_357_MOESM2_ESM.pdf [file 41437_2020_357_MOESM2_ESM.pdf]

**Table S1.** Number of markers and number of probes per chromosome

| <b>Scaffold</b> | <b>Scaffold Length<br/>(Kb)</b> | <b>Chromosome<br/>number</b> | <b>Number of<br/>markers</b> | <b>Number of<br/>Probes</b> |
|-----------------|---------------------------------|------------------------------|------------------------------|-----------------------------|
| VaccDscf1       | 46 295.995                      | 1                            | 8 793                        | 954                         |
| VaccDscf2       | 44 818.276                      | 2                            | 7 430                        | 815                         |
| VaccDscf4       | 42 981.373                      | 3                            | 8 216                        | 892                         |
| VaccDscf6       | 42 795.824                      | 4                            | 5 311                        | 583                         |
| VaccDscf7       | 41 705.179                      | 5                            | 7 163                        | 737                         |
| VaccDscf11      | 40 122.599                      | 6                            | 7 319                        | 825                         |
| VaccDscf12      | 39 741.682                      | 7                            | 5 665                        | 590                         |
| VaccDscf13      | 39 652.356                      | 8                            | 7 090                        | 771                         |
| VaccDscf17      | 38 874.919                      | 9                            | 7 824                        | 855                         |
| VaccDscf20      | 37 996.905                      | 10                           | 6 437                        | 690                         |
| VaccDscf21      | 37 975.728                      | 11                           | 8 565                        | 904                         |
| VaccDscf22      | 37 315.645                      | 12                           | 7 117                        | 774                         |
| <b>Total</b>    | <b>49 0276.481</b>              | <b>12</b>                    | <b>86 930</b>                | <b>9 390</b>                |

**Table S2.** Predictive ability (PA), standard deviation (SD), standard error of the mean (SE), confidence interval (95%; CI), and Tukey groups obtained for the analyses involving the number of probes and sequencing depth for fruit firmness, fruit weight, and yield.

| Sequencing Depth | Probe Filter | Trait    | PA    | SD    | SE    | CI    | *TukeyGroup |
|------------------|--------------|----------|-------|-------|-------|-------|-------------|
| 24               | 9630         | Firmness | 0.469 | 0.001 | 0     | 0.001 | a           |
| 48               | 9630         | Firmness | 0.471 | 0.001 | 0.001 | 0.002 | a           |
| 60               | 9630         | Firmness | 0.471 | 0     | 0     | 0.001 | a           |
| 12               | 9630         | Firmness | 0.468 | 0.003 | 0.001 | 0.003 | ba          |
| 6                | 9630         | Firmness | 0.465 | 0.007 | 0.003 | 0.009 | cba         |
| 24               | 2000         | Firmness | 0.449 | 0.001 | 0     | 0.001 | dcba        |
| 2                | 9630         | Firmness | 0.445 | 0.01  | 0.004 | 0.012 | edc         |
| 24               | 5000         | Firmness | 0.444 | 0.001 | 0     | 0.001 | edc         |
| 48               | 3000         | Firmness | 0.445 | 0.001 | 0     | 0.001 | edc         |
| 60               | 3000         | Firmness | 0.445 | 0.001 | 0     | 0.001 | edc         |
| 48               | 2000         | Firmness | 0.446 | 0.001 | 0     | 0.001 | edcb        |
| 60               | 2000         | Firmness | 0.446 | 0.002 | 0.001 | 0.002 | edcb        |
| 48               | 5000         | Firmness | 0.442 | 0.001 | 0.001 | 0.002 | fed         |
| 24               | 3000         | Firmness | 0.443 | 0.001 | 0     | 0.001 | fedc        |
| 60               | 5000         | Firmness | 0.443 | 0.001 | 0.001 | 0.001 | fedc        |
| 6                | 5000         | Firmness | 0.431 | 0.003 | 0.001 | 0.003 | gfed        |
| 12               | 2000         | Firmness | 0.428 | 0.002 | 0.001 | 0.002 | gfed        |
| 12               | 3000         | Firmness | 0.436 | 0.001 | 0     | 0.001 | gfed        |
| 12               | 5000         | Firmness | 0.437 | 0.003 | 0.001 | 0.003 | gfed        |
| 24               | 500          | Firmness | 0.427 | 0.005 | 0.002 | 0.006 | gfed        |
| 24               | 1000         | Firmness | 0.428 | 0.004 | 0.002 | 0.005 | gfed        |
| 48               | 500          | Firmness | 0.428 | 0.004 | 0.002 | 0.005 | gfed        |
| 48               | 1000         | Firmness | 0.432 | 0.003 | 0.001 | 0.004 | gfed        |
| 60               | 500          | Firmness | 0.429 | 0.004 | 0.002 | 0.005 | gfed        |
| 60               | 1000         | Firmness | 0.431 | 0.003 | 0.001 | 0.003 | gfed        |
| 6                | 2000         | Firmness | 0.425 | 0     | 0     | 0.001 | hgfe        |
| 12               | 1000         | Firmness | 0.418 | 0.003 | 0.001 | 0.004 | ihg         |
| 6                | 3000         | Firmness | 0.42  | 0.002 | 0.001 | 0.003 | ihgf        |
| 2                | 3000         | Firmness | 0.401 | 0.002 | 0.001 | 0.002 | ji          |
| 12               | 500          | Firmness | 0.401 | 0.003 | 0.001 | 0.004 | ji          |
| 2                | 2000         | Firmness | 0.404 | 0.003 | 0.001 | 0.003 | jih         |
| 2                | 5000         | Firmness | 0.4   | 0.002 | 0.001 | 0.003 | kji         |
| 6                | 1000         | Firmness | 0.391 | 0.003 | 0.001 | 0.004 | lkj         |
| 48               | 100          | Firmness | 0.378 | 0.009 | 0.004 | 0.011 | mlk         |
| 60               | 100          | Firmness | 0.383 | 0.012 | 0.005 | 0.015 | mlkj        |
| 6                | 500          | Firmness | 0.372 | 0.009 | 0.004 | 0.011 | nml         |
| 24               | 100          | Firmness | 0.372 | 0.012 | 0.005 | 0.015 | onml        |
| 2                | 1000         | Firmness | 0.361 | 0.004 | 0.002 | 0.005 | ponm        |
| 12               | 100          | Firmness | 0.352 | 0.009 | 0.004 | 0.011 | qpon        |
| 2                | 500          | Firmness | 0.334 | 0.006 | 0.003 | 0.008 | rq          |

|    |      |          |       |       |       |       |         |
|----|------|----------|-------|-------|-------|-------|---------|
| 24 | 50   | Firmness | 0.338 | 0.015 | 0.007 | 0.019 | rq      |
| 48 | 50   | Firmness | 0.348 | 0.017 | 0.008 | 0.022 | rqp     |
| 60 | 50   | Firmness | 0.35  | 0.02  | 0.009 | 0.025 | rqpo    |
| 6  | 100  | Firmness | 0.309 | 0.009 | 0.004 | 0.011 | s       |
| 12 | 50   | Firmness | 0.328 | 0.019 | 0.009 | 0.024 | sr      |
| 2  | 100  | Firmness | 0.252 | 0.015 | 0.007 | 0.018 | t       |
| 6  | 50   | Firmness | 0.269 | 0.023 | 0.01  | 0.028 | t       |
| 2  | 50   | Firmness | 0.219 | 0.028 | 0.012 | 0.034 | u       |
| 60 | 9630 | Weight   | 0.493 | 0     | 0     | 0     | a       |
| 12 | 9630 | Weight   | 0.488 | 0.003 | 0.001 | 0.003 | ba      |
| 24 | 9630 | Weight   | 0.492 | 0.002 | 0.001 | 0.002 | ba      |
| 48 | 9630 | Weight   | 0.492 | 0.001 | 0     | 0.001 | ba      |
| 6  | 9630 | Weight   | 0.485 | 0.002 | 0.001 | 0.002 | cba     |
| 2  | 9630 | Weight   | 0.475 | 0.013 | 0.006 | 0.016 | dcba    |
| 60 | 3000 | Weight   | 0.472 | 0.002 | 0.001 | 0.003 | dcba    |
| 48 | 3000 | Weight   | 0.469 | 0.002 | 0.001 | 0.003 | edcba   |
| 60 | 2000 | Weight   | 0.469 | 0.001 | 0     | 0.001 | edcba   |
| 60 | 5000 | Weight   | 0.468 | 0.003 | 0.002 | 0.004 | edcba   |
| 12 | 3000 | Weight   | 0.464 | 0.003 | 0.001 | 0.003 | fedcb   |
| 12 | 5000 | Weight   | 0.465 | 0.003 | 0.001 | 0.003 | fedcba  |
| 24 | 2000 | Weight   | 0.468 | 0.002 | 0.001 | 0.002 | fedcba  |
| 24 | 3000 | Weight   | 0.466 | 0.002 | 0.001 | 0.002 | fedcba  |
| 24 | 5000 | Weight   | 0.467 | 0.003 | 0.001 | 0.004 | fedcba  |
| 48 | 2000 | Weight   | 0.468 | 0.001 | 0     | 0.001 | fedcba  |
| 48 | 5000 | Weight   | 0.466 | 0.003 | 0.001 | 0.004 | fedcba  |
| 6  | 3000 | Weight   | 0.459 | 0.002 | 0.001 | 0.003 | gfedc   |
| 6  | 5000 | Weight   | 0.457 | 0.003 | 0.001 | 0.003 | hgfed   |
| 12 | 2000 | Weight   | 0.456 | 0.001 | 0     | 0.001 | hgfed   |
| 48 | 1000 | Weight   | 0.456 | 0.002 | 0.001 | 0.003 | ihgfed  |
| 60 | 1000 | Weight   | 0.456 | 0.002 | 0.001 | 0.003 | ihgfed  |
| 24 | 1000 | Weight   | 0.448 | 0.002 | 0.001 | 0.003 | jihgfed |
| 6  | 2000 | Weight   | 0.44  | 0.002 | 0.001 | 0.002 | kjihgf  |
| 2  | 3000 | Weight   | 0.443 | 0.002 | 0.001 | 0.002 | kjihgfe |
| 12 | 1000 | Weight   | 0.443 | 0.001 | 0.001 | 0.002 | kjihgfe |
| 6  | 1000 | Weight   | 0.422 | 0.003 | 0.001 | 0.003 | lkj     |
| 24 | 500  | Weight   | 0.423 | 0.005 | 0.002 | 0.006 | lkj     |
| 48 | 500  | Weight   | 0.428 | 0.008 | 0.004 | 0.01  | lkji    |
| 2  | 2000 | Weight   | 0.43  | 0.003 | 0.001 | 0.004 | lkjih   |
| 60 | 500  | Weight   | 0.43  | 0.007 | 0.003 | 0.009 | lkjih   |
| 2  | 5000 | Weight   | 0.433 | 0.003 | 0.001 | 0.003 | lkjihg  |
| 12 | 500  | Weight   | 0.416 | 0.008 | 0.004 | 0.01  | mlk     |
| 2  | 1000 | Weight   | 0.408 | 0.002 | 0.001 | 0.003 | nml     |
| 48 | 100  | Weight   | 0.383 | 0.019 | 0.008 | 0.023 | on      |
| 60 | 100  | Weight   | 0.386 | 0.02  | 0.009 | 0.024 | on      |
| 6  | 500  | Weight   | 0.39  | 0.011 | 0.005 | 0.013 | onm     |

|    |      |        |       |       |       |       |       |
|----|------|--------|-------|-------|-------|-------|-------|
| 2  | 500  | Weight | 0.365 | 0.007 | 0.003 | 0.009 | po    |
| 24 | 100  | Weight | 0.375 | 0.018 | 0.008 | 0.022 | po    |
| 12 | 100  | Weight | 0.354 | 0.019 | 0.008 | 0.023 | qp    |
| 48 | 50   | Weight | 0.35  | 0.021 | 0.009 | 0.026 | qp    |
| 60 | 50   | Weight | 0.349 | 0.021 | 0.009 | 0.026 | qp    |
| 6  | 100  | Weight | 0.318 | 0.013 | 0.006 | 0.016 | r     |
| 24 | 50   | Weight | 0.332 | 0.028 | 0.013 | 0.035 | rq    |
| 12 | 50   | Weight | 0.311 | 0.018 | 0.008 | 0.022 | sr    |
| 2  | 100  | Weight | 0.269 | 0.01  | 0.004 | 0.012 | t     |
| 6  | 50   | Weight | 0.284 | 0.022 | 0.01  | 0.028 | ts    |
| 2  | 50   | Weight | 0.234 | 0.03  | 0.013 | 0.037 | u     |
| 12 | 9630 | Yield  | 0.355 | 0.005 | 0.002 | 0.006 | a     |
| 24 | 9630 | Yield  | 0.357 | 0.002 | 0.001 | 0.002 | a     |
| 48 | 9630 | Yield  | 0.357 | 0.001 | 0     | 0.001 | a     |
| 60 | 9630 | Yield  | 0.357 | 0     | 0     | 0     | a     |
| 6  | 9630 | Yield  | 0.349 | 0.002 | 0.001 | 0.002 | ba    |
| 2  | 9630 | Yield  | 0.34  | 0.013 | 0.006 | 0.016 | cba   |
| 60 | 2000 | Yield  | 0.335 | 0.005 | 0.002 | 0.007 | dcba  |
| 24 | 2000 | Yield  | 0.332 | 0.006 | 0.003 | 0.007 | edcba |
| 48 | 2000 | Yield  | 0.333 | 0.005 | 0.002 | 0.006 | edcba |
| 60 | 1000 | Yield  | 0.326 | 0.002 | 0.001 | 0.002 | fedcb |
| 2  | 2000 | Yield  | 0.299 | 0.007 | 0.003 | 0.008 | g     |
| 6  | 1000 | Yield  | 0.296 | 0.002 | 0.001 | 0.002 | g     |
| 6  | 3000 | Yield  | 0.302 | 0.006 | 0.002 | 0.007 | gf    |
| 12 | 500  | Yield  | 0.305 | 0.007 | 0.003 | 0.009 | gf    |
| 2  | 3000 | Yield  | 0.307 | 0.003 | 0.001 | 0.004 | gfe   |
| 6  | 5000 | Yield  | 0.307 | 0.001 | 0.001 | 0.002 | gfe   |
| 24 | 500  | Yield  | 0.307 | 0.007 | 0.003 | 0.009 | gfe   |
| 2  | 5000 | Yield  | 0.311 | 0.001 | 0.001 | 0.002 | gfed  |
| 12 | 3000 | Yield  | 0.311 | 0.004 | 0.002 | 0.006 | gfed  |
| 6  | 2000 | Yield  | 0.317 | 0.006 | 0.003 | 0.007 | gfedc |
| 12 | 1000 | Yield  | 0.315 | 0.002 | 0.001 | 0.002 | gfedc |
| 12 | 2000 | Yield  | 0.321 | 0.004 | 0.002 | 0.005 | gfedc |
| 12 | 5000 | Yield  | 0.319 | 0.001 | 0.001 | 0.001 | gfedc |
| 24 | 1000 | Yield  | 0.317 | 0.002 | 0.001 | 0.003 | gfedc |
| 24 | 3000 | Yield  | 0.319 | 0.003 | 0.001 | 0.004 | gfedc |
| 24 | 5000 | Yield  | 0.321 | 0.001 | 0.001 | 0.002 | gfedc |
| 48 | 500  | Yield  | 0.318 | 0.005 | 0.002 | 0.007 | gfedc |
| 48 | 1000 | Yield  | 0.321 | 0.002 | 0.001 | 0.002 | gfedc |
| 48 | 3000 | Yield  | 0.321 | 0.004 | 0.002 | 0.005 | gfedc |
| 48 | 5000 | Yield  | 0.32  | 0.002 | 0.001 | 0.002 | gfedc |
| 60 | 500  | Yield  | 0.32  | 0.004 | 0.002 | 0.005 | gfedc |
| 60 | 3000 | Yield  | 0.322 | 0.004 | 0.002 | 0.005 | gfedc |
| 60 | 5000 | Yield  | 0.321 | 0.001 | 0.001 | 0.002 | gfedc |
| 2  | 1000 | Yield  | 0.261 | 0.003 | 0.001 | 0.004 | h     |

|    |     |       |       |       |       |       |     |
|----|-----|-------|-------|-------|-------|-------|-----|
| 6  | 500 | Yield | 0.265 | 0.002 | 0.001 | 0.003 | h   |
| 60 | 100 | Yield | 0.247 | 0.015 | 0.007 | 0.019 | ih  |
| 24 | 100 | Yield | 0.235 | 0.02  | 0.009 | 0.025 | ji  |
| 48 | 100 | Yield | 0.242 | 0.015 | 0.007 | 0.018 | jih |
| 2  | 500 | Yield | 0.22  | 0.007 | 0.003 | 0.008 | kj  |
| 12 | 100 | Yield | 0.225 | 0.022 | 0.01  | 0.027 | kji |
| 6  | 100 | Yield | 0.207 | 0.022 | 0.01  | 0.027 | lk  |
| 48 | 50  | Yield | 0.199 | 0.016 | 0.007 | 0.02  | mlk |
| 60 | 50  | Yield | 0.204 | 0.016 | 0.007 | 0.02  | mlk |
| 12 | 50  | Yield | 0.166 | 0.005 | 0.002 | 0.006 | n   |
| 2  | 100 | Yield | 0.177 | 0.015 | 0.007 | 0.019 | nm  |
| 24 | 50  | Yield | 0.184 | 0.009 | 0.004 | 0.012 | nml |
| 6  | 50  | Yield | 0.138 | 0.028 | 0.012 | 0.034 | o   |
| 2  | 50  | Yield | 0.093 | 0.032 | 0.014 | 0.04  | p   |

---

Tukey groups obtained for the analyses involving the number of probes and sequencing depth for fruit firmness, fruit weight, and yield considering  $\alpha=0.05$ , groups that share a letter are not significantly different from one another and  $a > b > \dots > z$
